# Supplementary material
Source: MDPI journal article supplement (https://www.mdpi.com/2073-4441/14/5/766)
Supplement: s1 [file s1]

*Supplementary material*

# **Prediction of Second–Order Rate Constants of Sulfate Radical with Aromatic Contaminants Using Quantitative Structure–Activity Relationship Model**

**Han Ding and Jiangyong Hu\***

Department of Civil & Environmental Engineering, National University of Singapore, 1 Engineering Drive 2, 117576, Singapore; dingh09@u.nus.edu

\* Correspondence: ceehu@nus.edu.sg

**Table S1.** Values of molecular descriptors and  $\log k_{\text{SO}_4^-}$  for selected aromatic compounds.

| No.                 | Aromatic compound         | CAS number | Molecular formula                               | Electron density | Steric energy | O/C    | $\log V$ | $\log P$ | $\log k_{\text{SO}_4^-}$ | References |
|---------------------|---------------------------|------------|-------------------------------------------------|------------------|---------------|--------|----------|----------|--------------------------|------------|
| <b>Training set</b> |                           |            |                                                 |                  |               |        |          |          |                          |            |
| 1                   | 1,2,3-Trimethoxybenzene   | 634-36-6   | C <sub>9</sub> H <sub>12</sub> O <sub>3</sub>   | 5.3097           | 18.5952       | 0.3333 | 2.2060   | 1.62     | 9.8451                   | [1]        |
| 2                   | 1,2,4-Trimethoxybenzene   | 135-77-3   | C <sub>9</sub> H <sub>12</sub> O <sub>3</sub>   | 5.3022           | 16.7465       | 0.3333 | 2.2060   | 1.64     | 9.8921                   | [1]        |
| 3                   | 1,2-Dimethoxybenzene      | 91-16-7    | C <sub>8</sub> H <sub>10</sub> O <sub>2</sub>   | 5.2826           | 10.8967       | 0.2500 | 2.1308   | 1.61     | 9.6990                   | [1]        |
| 4                   | 1,3-Dimethoxybenzene      | 151-10-0   | C <sub>8</sub> H <sub>10</sub> O <sub>2</sub>   | 5.2737           | 11.6098       | 0.2500 | 2.1308   | 2.03     | 9.8451                   | [1]        |
| 5                   | 1,4-Dimethoxybenzene      | 150-78-7   | C <sub>8</sub> H <sub>10</sub> O <sub>2</sub>   | 5.2593           | 11.4474       | 0.2500 | 2.1308   | 2.05     | 9.8573                   | [1]        |
| 6                   | 2,3-Dimethoxybenzoate     | 1521-38-6  | C <sub>9</sub> H <sub>9</sub> O <sub>4</sub>    | 5.2986           | 18.6652       | 0.4444 | 2.2025   | -1.74    | 9.9294                   | [2]        |
| 7                   | 2,4-Dimethoxybenzoate     | 91-52-1    | C <sub>9</sub> H <sub>9</sub> O <sub>4</sub>    | 5.1884           | 19.8398       | 0.4444 | 2.2025   | -1.52    | 9.5798                   | [2]        |
| 8                   | 2-Bromotoluene            | 95-46-5    | C <sub>7</sub> H <sub>7</sub> Br                | 5.1262           | 1.6964        | 0.0000 | 2.0737   | 3.15     | 9.3617                   | [3]        |
| 9                   | 2-Chlorotoluene*          | 95-49-8    | C <sub>7</sub> H <sub>7</sub> Cl                | 5.1759           | 1.3082        | 0.0000 | 2.0574   | 3.02     | 9.2304                   | [3]        |
| 10                  | 2-Hydroxybenzothiazole    | 934-34-9   | C <sub>7</sub> H <sub>5</sub> NOS               | 5.3964           | 6.2913        | 0.1111 | 2.0889   | 1.82     | 9.6721                   | [4]        |
| 11                  | 2-Methylthiobenzothiazole | 615-22-5   | C <sub>8</sub> H <sub>7</sub> NS <sub>2</sub>   | 5.0370           | -0.5450       | 0.0000 | 2.1740   | 3.09     | 9.1461                   | [4]        |
| 12                  | 3,4,5-trimethoxybenzoate  | 118-41-2   | C <sub>10</sub> H <sub>11</sub> O <sub>5</sub>  | 5.3323           | 20.6624       | 0.5000 | 2.2670   | -1.93    | 9.6990                   | [2]        |
| 13                  | 3,4-Dichloroaniline       | 95-76-1    | C <sub>6</sub> H <sub>5</sub> Cl <sub>2</sub> N | 5.1695           | 0.0915        | 0.0000 | 2.0878   | 2.30     | 9.6721                   | [5]        |
| 14                  | 3,4-Dimethoxybenzoate     | 93-07-2    | C <sub>9</sub> H <sub>9</sub> O <sub>4</sub>    | 5.2955           | 14.9384       | 0.4444 | 2.2025   | -1.92    | 9.6532                   | [2]        |
| 15                  | 3,5-Dimethoxybenzoate     | 1132-21-4  | C <sub>9</sub> H <sub>9</sub> O <sub>4</sub>    | 5.2516           | 14.9731       | 0.4444 | 2.2025   | -1.52    | 9.6435                   | [2]        |
| 16                  | 4-(2-Hydroxyethyl)phenol* | 501-94-0   | C <sub>8</sub> H <sub>10</sub> O <sub>2</sub>   | 5.2789           | 0.9682        | 0.2500 | 2.1261   | 1.00     | 9.2380                   | [6]        |
| 17                  | 4-Hydroxybenzoate*        | 456-23-5   | C <sub>7</sub> H <sub>5</sub> O <sub>3</sub>    | 5.3984           | 1.8176        | 0.4286 | 2.0657   | -1.43    | 9.3979                   | [7]        |
| 18                  | 4-Isobutylacetophenone    | 38861-78-8 | C <sub>12</sub> H <sub>16</sub> O               | 5.2500           | 9.1362        | 0.0833 | 2.2703   | 3.14     | 9.5211                   | [8]        |
| 19                  | 4-Methoxybenzoate         | 100-09-4   | C <sub>8</sub> H <sub>7</sub> O <sub>3</sub>    | 5.3849           | 9.4362        | 0.3750 | 2.1266   | -1.50    | 9.8808                   | [2]        |
| 20                  | 4-Toluate                 | 5118-31-0  | C <sub>8</sub> H <sub>7</sub> O <sub>2</sub>    | 5.1552           | 4.3902        | 0.2500 | 2.0964   | -1.11    | 9.2553                   | [7]        |
| 21                  | Acetaminophen             | 103-90-2   | C <sub>8</sub> H <sub>9</sub> NO <sub>2</sub>   | 5.2475           | -7.8295       | 0.2500 | 2.1462   | 0.68     | 9.6721                   | [9]        |
| 22                  | Acetanilide               | 103-84-4   | C <sub>8</sub> H <sub>9</sub> NO                | 5.1059           | -7.0445       | 0.1250 | 2.1205   | 1.16     | 9.5563                   | [7]        |

| No. | Aromatic compound                   | CAS number  | Molecular formula | Electron density | Steric energy | O/C    | logV   | logP  | logk <sub>SO<sub>4</sub><sup>2-</sup></sub> | References |
|-----|-------------------------------------|-------------|-------------------|------------------|---------------|--------|--------|-------|---------------------------------------------|------------|
| 23  | Amitriptyline HCl                   | 549–18–8    | C20H24ClN         | 5.2880           | 44.6729       | 0.0000 | 2.4551 | 4.19  | 9.6812                                      | [10]       |
| 24  | Amoxicillin                         | 26787–78–0  | C16H19N3O5S       | 5.3046           | 50.0119       | 0.3125 | 2.4870 | −1.35 | 9.5416                                      | [11]       |
| 25  | Anisole                             | 100–66–3    | C7H8O             | 5.2523           | 5.5171        | 0.1429 | 2.0398 | 1.99  | 9.6902                                      | [1]        |
| 26  | Aspartame                           | 22839–47–0  | C14H18N2O5        | 5.0243           | −8.2745       | 0.3571 | 2.4241 | −0.55 | 9.3579                                      | [12]       |
| 27  | Benzene                             | 71–43–2     | C6H6              | 4.9871           | −0.5741       | 0.0000 | 1.9245 | 1.94  | 9.4771                                      | [7]        |
| 28  | Benzoate                            | 766–76–7    | C7H5O2            | 5.1147           | 4.0592        | 0.2857 | 2.0346 | −1.56 | 9.0792                                      | [7]        |
| 29  | Benzophenone                        | 119–61–9    | C13H10O           | 5.0665           | 30.1467       | 0.0769 | 2.2416 | 3.39  | 9.6021                                      | [13]       |
| 30  | Benzothiazole                       | 95–16–9     | C7H5NS            | 5.0075           | 3.6929        | 0.0000 | 2.0591 | 2.37  | 9.5185                                      | [4]        |
| 31  | Cefaclor                            | 53994–73–3  | C15H14ClN3O4S     | 5.0678           | 61.5558       | 0.2667 | 2.4627 | −1.70 | 9.2788                                      | [11]       |
| 32  | Diclofenac                          | 15307–86–5  | C14H11Cl2NO2      | 5.2123           | 37.6046       | 0.1429 | 2.3779 | 4.57  | 9.8261                                      | [14]       |
| 33  | Diuron                              | 330–54–1    | C9H10Cl2N2O       | 5.1128           | 4.6142        | 0.1111 | 2.2751 | 2.58  | 9.7160                                      | [5]        |
| 34  | Fenuron                             | 101–42–8    | C9H12N2O          | 5.0808           | −0.0061       | 0.1111 | 2.2077 | 1.30  | 9.6628                                      | [5]        |
| 35  | Fluomethuron                        | 2164–17–2   | C10H11F3N2O       | 5.1617           | 5.9923        | 0.1000 | 2.2847 | 2.17  | 9.6628                                      | [5]        |
| 36  | Fluorobenzene                       | 462–06–6    | C6H5F             | 5.0096           | −0.6765       | 0.0000 | 1.9492 | 2.10  | 8.9912                                      | [15]       |
| 37  | Gallate ion                         | 149–91–7    | C7H5O5            | 5.4847           | −13.3754      | 0.7143 | 2.1218 | −2.01 | 9.4624                                      | [16]       |
| 38  | <b>Gatifloxacin*</b>                | 112811–59–3 | C19H22FN3O4       | 5.2277           | 81.6246       | 0.2105 | 2.5153 | −0.04 | 9.4771                                      | [17]       |
| 39  | Ibuprofen                           | 15687–27–1  | C13H18O2          | 5.1125           | 1.7199        | 0.1538 | 2.3247 | 3.46  | 9.5798                                      | [18]       |
| 40  | Isoproturon                         | 34123–59–6  | C12H18N2O         | 5.1328           | 2.0694        | 0.0833 | 2.3249 | 2.81  | 9.4624                                      | [5]        |
| 41  | Linuron                             | 330–55–2    | C9H10Cl2N2O2      | 5.3083           | 4.2866        | 0.2222 | 2.2953 | 2.93  | 9.7076                                      | [5]        |
| 42  | Methyl 2–aminobenzoate              | 134–20–3    | C8H9NO2           | 5.1238           | 12.4301       | 0.2500 | 2.1457 | 1.72  | 9.7482                                      | [19]       |
| 43  | Metoprolol                          | 51384–51–1  | C15H25NO3         | 5.2594           | 18.1062       | 0.2000 | 2.4361 | 1.97  | 9.7084                                      | [20]       |
| 44  | m–Hydroxybenzaldehyde               | 100–83–4    | C7H6O2            | 5.2399           | 4.6039        | 0.2857 | 2.0455 | 1.22  | 9.6232                                      | [21]       |
| 45  | Monolinuron                         | 1746–81–2   | C9H11ClN2O2       | 5.1632           | 1.1854        | 0.2222 | 2.2645 | 2.33  | 9.7782                                      | [5]        |
| 46  | N–(p–Amylcinnamoyl)anthranilic acid | 110683–10–8 | C21H23NO3         | 5.1129           | 6.5453        | 0.1429 | 2.5119 | 5.88  | 9.3997                                      | [11]       |

| No.                   | Aromatic compound     | CAS number | Molecular formula | Electron density | Steric energy | O/C    | logV   | logP  | logk <sub>SO<sub>4</sub><sup>-</sup></sub> | References |
|-----------------------|-----------------------|------------|-------------------|------------------|---------------|--------|--------|-------|--------------------------------------------|------------|
| 47                    | Nortriptylene HCl     | 894-71-3   | C19H21N           | 5.2812           | 42.4997       | 0.0000 | 2.4206 | 3.94  | 10.3010                                    | [22]       |
| 48                    | o-Cresol              | 95-48-7    | C7H8O             | 5.2732           | -2.3763       | 0.1429 | 2.0359 | 2.33  | 9.8325                                     | [23]       |
| 49                    | o-Hydroxybenzaldehyde | 90-02-8    | C7H6O2            | 5.3257           | 4.7154        | 0.2857 | 2.0455 | 1.67  | 9.7924                                     | [21]       |
| 50                    | p-Cresol              | 106-44-5   | C7H8O             | 5.2671           | -1.6501       | 0.1429 | 2.0359 | 1.91  | 9.7634                                     | [23]       |
| 51                    | Penicillin G          | 61-33-6    | C16H18N2O4S       | 5.0016           | 60.4921       | 0.2500 | 2.4587 | 1.82  | 9.1584                                     | [11]       |
| 52                    | <b>Penicillin V*</b>  | 87-08-1    | C16H18N2O5S       | 5.2072           | 61.9168       | 0.3125 | 2.4721 | 1.70  | 9.3010                                     | [11]       |
| 53                    | Phenanthrene          | 85-01-8    | C14H10            | 5.0549           | -3.5522       | 0.0000 | 2.2356 | 4.30  | 9.5052                                     | [24]       |
| 54                    | Propranolol           | 525-66-6   | C16H21NO2         | 5.2752           | 8.4327        | 0.1250 | 2.4113 | 2.97  | 9.6803                                     | [20]       |
| 55                    | p-Xylene              | 106-42-3   | C8H10             | 5.0215           | -0.5808       | 0.0000 | 2.0688 | 2.83  | 9.4314                                     | [25]       |
| 56                    | Sulfacetamide         | 144-80-9   | C8H10N2O3S        | 5.1557           | 181.7001      | 0.3750 | 2.2423 | -0.56 | 9.7782                                     | [26]       |
| 57                    | Sulfamerazine         | 127-79-7   | C11H12N4O2S       | 5.3173           | 185.4982      | 0.1818 | 2.3401 | 0.40  | 10.6902                                    | [27]       |
| 58                    | Sulfamethazine        | 57-68-1    | C12H14N4O2S       | 5.4017           | 184.0830      | 0.1667 | 2.3718 | 0.84  | 10.5539                                    | [27]       |
| 59                    | Sulfamonomethoxine    | 1220-83-3  | C11H12N4O3S       | 5.2500           | 186.1896      | 0.2727 | 2.3576 | 0.38  | 10.1239                                    | [27]       |
| 60                    | Sulfathiazole         | 72-14-0    | C9H9N3O2S2        | 5.3000           | 179.7674      | 0.2222 | 2.2948 | 0.83  | 10.6730                                    | [27]       |
| 61                    | Sulfisoxazole         | 127-69-5   | C11H13N3O3S       | 5.6191           | 189.2402      | 0.2727 | 2.3446 | 0.99  | 11.2068                                    | [27]       |
| 62                    | Terbutaline           | 23031-25-6 | C12H19NO3         | 5.1964           | 2.2294        | 0.2500 | 2.3430 | 1.07  | 9.6232                                     | [28]       |
| 63                    | Toluene               | 108-88-3   | C7H8              | 5.0263           | -0.5693       | 0.0000 | 2.0026 | 2.39  | 9.4914                                     | [29]       |
| 64                    | Trimethoprim          | 738-70-5   | C14H18N4O3        | 5.2699           | 25.0018       | 0.2143 | 2.4202 | 0.99  | 9.8871                                     | [30]       |
| 65                    | Venlafaxine           | 93413-69-5 | C17H27NO2         | 5.2839           | 26.9026       | 0.1176 | 2.4576 | 3.81  | 9.5478                                     | [20]       |
| 66                    | α-Terpineol           | 98-55-5    | C10H18O           | 5.1751           | 10.4009       | 0.1000 | 2.2321 | 2.60  | 9.6128                                     | [31]       |
| <b>Validation set</b> |                       |            |                   |                  |               |        |        |       |                                            |            |
| 1                     | 1H-Benzotriazole      | 95-14-7    | C6H5N3            | 5.0484           | 8.3711        | 0.0000 | 2.0200 | 1.29  | 9.0414                                     | [22]       |
| 2                     | 2-Methoxybenzoate     | 579-75-9   | C8H7O3-           | 5.2057           | 6.6360        | 0.3750 | 2.1266 | -1.55 | 9.8451                                     | [2]        |
| 3                     | 2-Toluate             | 118-90-1   | C8H7O2-           | 5.1576           | 9.7565        | 0.2500 | 2.0964 | -1.16 | 9.1461                                     | [7]        |
| 4                     | 3-Bromotoluene        | 591-17-3   | C7H7Br            | 5.2121           | -0.1172       | 0.0000 | 2.0737 | 3.17  | 9.2304                                     | [3]        |

| No. | Aromatic compound     | CAS number | Molecular formula | Electron density | Steric energy | O/C    | logV   | logP  | logk <sub>SO<sub>4</sub><sup>-</sup></sub> | References |
|-----|-----------------------|------------|-------------------|------------------|---------------|--------|--------|-------|--------------------------------------------|------------|
| 5   | 3-Methoxybenzoate     | 586–38–9   | C8H7O3–           | 5.2351           | 9.8494        | 0.3750 | 2.1266 | –1.53 | 9.8808                                     | [2]        |
| 6   | 3-Toluate             | 99–04–7    | C8H7O2–           | 5.1444           | 4.4702        | 0.2500 | 2.0964 | –1.14 | 9.3010                                     | [7]        |
| 7   | Acetophenone          | 98–86–2    | C8H8O             | 5.0543           | 6.9851        | 0.1250 | 2.0777 | 1.84  | 9.2553                                     | [13]       |
| 8   | Ampicillin            | 69–53–4    | C16H19N3O4S       | 5.0748           | 55.8551       | 0.2500 | 2.4755 | –0.87 | 9.2718                                     | [11]       |
| 9   | Atenolol              | 29122–68–7 | C14H22N2O3        | 5.2683           | 1.1114        | 0.2143 | 2.4165 | 0.72  | 9.7084                                     | [20]       |
| 10  | Benzaldehyde          | 100–52–7   | C7H6O             | 5.0411           | 5.7158        | 0.1429 | 2.0130 | 1.73  | 8.8513                                     | [13]       |
| 11  | Bromobenzene          | 108–86–1   | C6H5Br            | 5.1604           | 0.0390        | 0.0000 | 2.0083 | 2.75  | 9.2553                                     | [29]       |
| 12  | Carbamazepine         | 298–46–4   | C15H12N2O         | 5.0417           | 9.0775        | 0.0667 | 2.3326 | 2.84  | 9.2833                                     | [32]       |
| 13  | Chlorobenzene         | 108–90–7   | C6H5Cl            | 5.1534           | –0.1436       | 0.0000 | 1.9894 | 2.62  | 9.1761                                     | [29]       |
| 14  | Clofibric acid        | 882–09–7   | C10H11ClO3        | 5.1938           | 11.1571       | 0.3000 | 2.2629 | 2.73  | 9.2380                                     | [33]       |
| 15  | m-Cresol              | 108–39–4   | C7H8O             | 5.2734           | –1.6118       | 0.1429 | 2.0359 | 1.88  | 9.8451                                     | [23]       |
| 16  | Mesitylene            | 108–67–8   | C9H12             | 5.0792           | –0.5166       | 0.0000 | 2.1262 | 3.21  | 9.1139                                     | [25]       |
| 17  | Monuron               | 150–68–5   | C9H11ClN2O        | 5.1618           | 1.1838        | 0.1111 | 2.2427 | 1.98  | 9.6990                                     | [5]        |
| 18  | Naproxen              | 22204–53–1 | C14H14O3          | 5.2833           | 6.5893        | 0.2143 | 2.3304 | 3.38  | 9.7513                                     | [20]       |
| 19  | Phenol                | 108–95–2   | C6H6O             | 5.2644           | –1.5844       | 0.1667 | 1.9641 | 1.46  | 9.7924                                     | [23]       |
| 20  | p-Hydroxybenzaldehyde | 123–08–0   | C7H6O2            | 5.3300           | 4.6324        | 0.2857 | 2.0455 | 1.25  | 9.7709                                     | [21]       |
| 21  | Sulfadiazine          | 68–35–9    | C10H10N4O2S       | 5.3006           | 186.2394      | 0.2000 | 2.3059 | –0.04 | 10.6191                                    | [27]       |
| 22  | Sulfamethoxazole      | 723–46–6   | C10H11N3O3S       | 5.3507           | 187.8270      | 0.3000 | 2.3108 | 0.61  | 10.2068                                    | [30]       |

\*Outliers.

Text S1. Python code for the y-randomisation test.

```
import numpy as np
from sklearn.linear_model import LinearRegression
from sklearn.metrics import r2_score
import pandas as pd
import matplotlib.pyplot as plt

df = pd.read_excel("training_dataset.xlsx")
Y = df['logK'].to_numpy()
X = df[['E', 'S', 'O/C']].to_numpy()
shuffled_r2 = []

for i in range(100):
    np.random.shuffle(Y)
    reg = LinearRegression()
    reg.fit(X, Y)
    ypred = reg.predict(X)
    shuffled_r2.append(r2_score(Y, ypred))

ypoints = np.array(shuffled_r2)
xpoints = np.arange(1, 101, 1)

plt.plot(xpoints, ypoints)
plt.xlabel("Shuffled times")
plt.ylabel('R2')
plt.savefig("FigureS1.jpg", dpi=600)
```

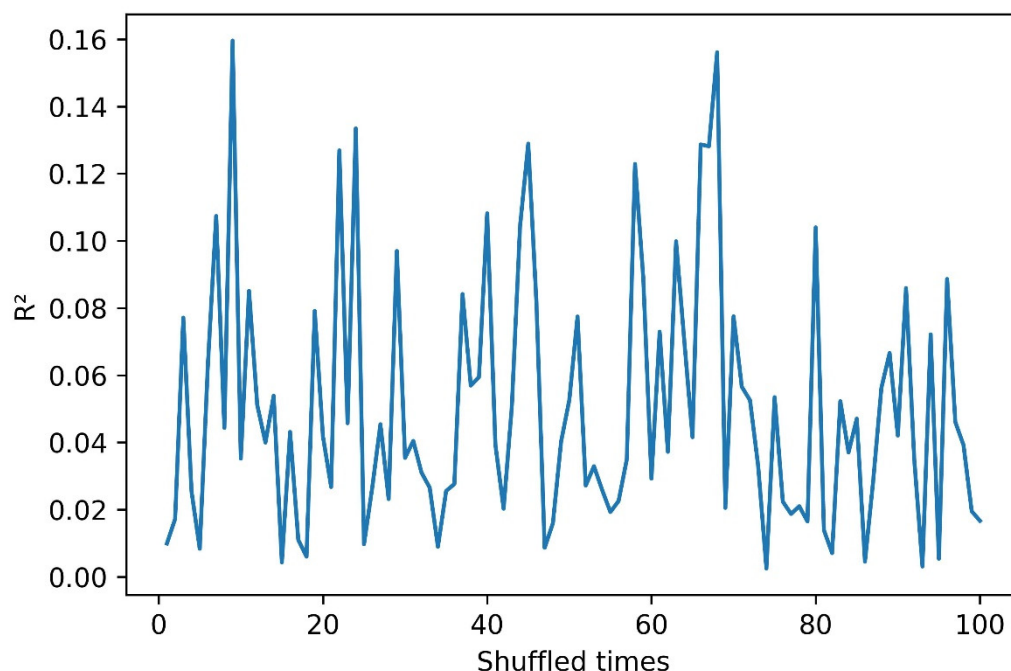

**Figure S1.** The  $R^2$  of shuffled  $\log k_{\text{SO}_4^{\bullet-}}$  regressed against fixed  $E$ ,  $S$  and  $O/C$ .

## References

- O'Neill, P.; Steenken, S.; Schulte-Frohlinde, D. Formation of radical cations of methoxylated benzenes by reaction with hydroxyl radicals, thallium(2+), silver(2+), and peroxysulfate ( $\text{SO}_4^{\bullet-}$ ) in aqueous solution. Optical and conductometric pulse radiolysis and in situ radiolysis electron spin resonance study. *J. Phys. Chem.* **1975**, *79*(25), 2773–2779.
- Steenken, S.; O'Neill, P.; Schulte-Frohlinde, D. Formation of radical zwitterions from methoxylated benzoic acids. 1. One electron oxidation by thallium(2+), silver(2+), and sulfate(1-) ions. *J. Phys. Chem.* **1977**, *81*(1), 26–30.
- Choure, S.C.; Bamatraf, M.M.M.; Rao, B.S.M.; Das, R.; Mohan, H.; Mittal, J.P. Hydroxylation of Chlorotoluenes and Cresols: A Pulse Radiolysis, Laser Flash Photolysis, and Product Analysis Study. *J. Phys. Chem. A* **1997**, *101*(51), 9837–9845.
- Zhang, T.; Chen, Y.; Leiknes, T. Oxidation of Refractory Benzothiazoles with PMS/CuFe<sub>2</sub>O<sub>4</sub>: Kinetics and Transformation Intermediates. *Environ. Sci. Technol.* **2016**, *50*(11), 5864–5873.
- Canle López, M.; Fernández, M.I.; Rodríguez, S.; Santaballa, J.A.; Steenken, S.; Vulliet, E. Mechanisms of Direct and TiO<sub>2</sub>-Photocatalysed UV Degradation of Phenylurea Herbicides. *Chemphyschem* **2005**, *6*(10), 2064–2074.
- Kilic, M.Y.; Abdelraheem, W.H.; He, X.; Kestioglu, K.; Dionysiou, D.D. Photochemical treatment of tyrosol, a model phenolic compound present in olive mill wastewater, by hydroxyl and sulfate radical-based advanced oxidation processes (AOPs). *J. Hazard. Mater.* **2019**, *367*, 734–742.
- Neta, P.; Madhavan, V.; Zemel, H.; Fessenden, R.W. Rate constants and mechanism of reaction of sulfate radical anion with aromatic compounds. *J. Am. Chem. Soc.* **1977**, *99*(1), 163–164.
- Kwon, M.; Kim, S.; Yoon, Y.; Jung, Y.; Hwang, T.-M.; Lee, J.; Kang, J.-W. Comparative evaluation of ibuprofen removal by UV/H<sub>2</sub>O<sub>2</sub> and UV/S<sub>2</sub>O<sub>8</sub><sup>2-</sup> processes for wastewater treatment. *Chem. Eng. J.* **2015**, *269*, 379–390.
- Li, A.; Wu, Z.; Wang, T.; Hou, S.; Huang, B.; Kong, X.; Li, X.; Guan, Y.; Qiu, R.; Fang, J. Kinetics and mechanisms of the degradation of PPCPs by zero-valent iron ( $\text{Fe}^0$ ) activated peroxydisulfate (PDS) system in groundwater. *J. Hazard. Mater.* **2018**, *357*, 207–216.
- Real, F.J.; Acero, J.L.; Benitez, J.F.; Roldan, G.; Casas, F. Oxidation of the emerging contaminants amitriptyline hydrochloride, methyl salicylate and 2-phenoxyethanol by persulfate activated by UV irradiation. *J. Chem. Technol. Biotechnol.* **2016**, *91*(4), 1004–1011.
- Rickman, K.A.; Mezyk, S.P. Kinetics and mechanisms of sulfate radical oxidation of  $\beta$ -lactam antibiotics in water. *Chemosphere* **2010**, *81*(3), 359–365.
- Toth, J.E.; Rickman, K.A.; Venter, A.R.; Kiddle, J.J.; Mezyk, S.P. Reaction Kinetics and Efficiencies for the Hydroxyl and Sulfate Radical Based Oxidation of Artificial Sweeteners in Water. *J. Phys. Chem. A* **2012**, *116*(40), 9819–9824.
- Sharma, S.B.; Mudaliar, M.; Rao, B.S.M.; Mohan, H.; Mittal, J.P. Radiation Chemical Oxidation of Benzaldehyde, Acetophenone, and Benzophenone. *J. Phys. Chem. A* **1997**, *101*(45), 8402–8408.

14. Mahdi Ahmed, M.; Barbati, S.; Doumenq, P. and Chiron, S. Sulfate radical anion oxidation of diclofenac and sulfamethoxazole for water decontamination. *Chem. Eng. J.* **2012**, *197*, 440–447.
15. Mohan, H.; Mittal, J.P. Direct evidence for H<sup>+</sup>-catalysed dehydration of fluorohydroxycyclohexadienyl radical: A pulse radiolysis study. *J. Chem. Soc.–Faraday Trans.* **1995**, *91*(14), 2121–2126.
16. Caregnato, P.; David Gara, P.M.; Bosio, G.N.; Gonzalez, M.C.; Russo, N.; Michelini, M.d.C.; Mártire, D.O. Theoretical and Experimental Investigation on the Oxidation of Gallic Acid by Sulfate Radical Anions. *J. Phys. Chem. A* **2008**, *112*(6), 1188–1194.
17. Li, H.; Liu, Y.; Tang, R.; Zhang, P.; Fu, H.; Yao, S.; Wang, W. Pulse radiolysis study on gatifloxacin — A fluoroquinolone antibiotic. *Sci. China–Chem.* **2012**, *55*(7), 1358–1363.
18. Paul, J.; Jensen, S.; Dukart, A.; Cornelissen, G. Optimization of a preparative multimodal ion exchange step for purification of a potential malaria vaccine. *J. Chromatogr. A* **2014**, *1366*, 38–44.
19. Lanzafame, G.M.; Sarakha, M.; Fabbri, D.; Vione, D. Degradation of Methyl 2-Aminobenzoate (Methyl Anthranilate) by H<sub>2</sub>O<sub>2</sub>/UV: Effect of Inorganic Anions and Derived Radicals. *Molecules* **2017**, *22*(4).
20. Lian, L.; Yao, B.; Hou, S.; Fang, J.; Yan, S.; Song, W. Kinetic Study of Hydroxyl and Sulfate Radical-Mediated Oxidation of Pharmaceuticals in Wastewater Effluents. *Environ. Sci. Technol.* **2017**, *51*(5), 2954–2962.
21. Geeta, S.; Sharma, S.B.; Rao, B.S.M.; Mohan, H.; Dhanya, S.; Mittal, J.P. Study of kinetics and absorption spectra of OH adducts of hydroxy derivatives of benzaldehyde and acetophenone. *J. Photochem. Photobiol. A: Chem.* **2001**, *140*(2), 99–107.
22. Acero, J.L.; Benítez, F.J.; Real, F.J.; Rodríguez, E. Degradation of selected emerging contaminants by UV-activated persulfate: Kinetics and influence of matrix constituents. *Sep. Purif. Technol.* **2018**, *201*, 41–50.
23. Roder, M.; Földiák, G.; Wojnárovits, L. Electron transfer from cresols to N<sub>3</sub>, BrO<sub>2</sub>, ClO<sub>2</sub>, NO<sub>2</sub> and SO<sub>4</sub><sup>•−</sup> radicals: Correlation between rate constants and one-electron reduction potentials. *Radiat. Phys. Chem.* **1999**, *55*(5), 515–519.
24. Tao, Y.; Monfort, O.; Brigante, M.; Zhang, H.; Mailhot, G. Phenanthrene decomposition in soil washing effluents using UVB activation of hydrogen peroxide and peroxydisulfate. *Chemosphere* **2021**, *263*, 127996.
25. Herrmann, H.; Exner, M.; Jacobi, H.W.; Raabe, G.; Reese, A.; Zellner, R. Laboratory studies of atmospheric aqueous-phase free-radical chemistry: Kinetic and spectroscopic studies of reactions of NO<sub>3</sub> and SO<sub>4</sub><sup>•−</sup> radicals with aromatic compounds. *Faraday Discuss.* **1995**, *100*(0), 129–153.
26. Sabharwal, S.; Kishore, K. and Moorthy, P.N. Pulse radiolysis study of oxidation reactions of sulphacetamide in aqueous solutions. *Radiat. Phys. Chem.* **1994**, *44*(5), 499–506.
27. Zhang, R.; Yang, Y.; Huang, C.-H.; Zhao, L.; Sun, P. Kinetics and modeling of sulfonamide antibiotic degradation in wastewater and human urine by UV/H<sub>2</sub>O<sub>2</sub> and UV/PDS. *Water Res.* **2016**, *103*, 283–292.
28. Zhou, L.; Ferronato, C.; Chovelon, J.-M.; Sleiman, M.; Richard, C. Investigations of diatrizoate degradation by photo-activated persulfate. *Chem. Eng. J.* **2017**, *311*, 28–36.
29. Merga, G.; Aravindakumar, C.T.; Rao, B.S.M.; Mohan, H.; Mittal, J.P. Pulse radiolysis study of the reactions of SO with some substituted benzenes in aqueous solution. *J. Chem. Soc.–Faraday Trans.* **1994**, *90*(4), 597–604.
30. Zhang, R.; Sun, P.; Boyer, T.H.; Zhao, L.; Huang, C.-H. Degradation of Pharmaceuticals and Metabolite in Synthetic Human Urine by UV, UV/H<sub>2</sub>O<sub>2</sub>, and UV/PDS. *Environ. Sci. Technol.* **2015**, *49*(5), 3056–3066.
31. Buxton, G.V.; Salmon, G.A.; Williams, J.E. The Reactivity of Biogenic Monoterpenes towards OH<sup>•</sup> and SO<sub>4</sub><sup>•−</sup> Radicals in De-Oxygenated Acidic Solution. *J. Atmos. Chem.* **2000**, *36*(2), 111–134.
32. Matta, R.; Tlili, S.; Chiron, S.; Barbati, S. Removal of carbamazepine from urban wastewater by sulfate radical oxidation. *Environ. Chem. Lett.* **2011**, *9*(3), 347–353.
33. Lu, X.; Shao, Y.; Gao, N.; Chen, J.; Deng, H.; Chu, W.; An, N.; Peng, F. Investigation of clofibric acid removal by UV/persulfate and UV/chlorine processes: Kinetics and formation of disinfection byproducts during subsequent chlor(am)ination. *Chem. Eng. J.* **2018**, *331*, 364–371.
